# Supplementary material
Source: HighWire-hosted journal article supplement (https://www.cmajopen.ca/highwire/filestream/81323/field_highwire_adjunct_files/0/2018-0185-1-at.pdf)
Supplement: 2018-0185-1-at.pdf [file 2018-0185-1-at.pdf]

## Appendix 1 (as supplied by the authors): Description of independent predictors

| Key variables                                                                                                                     | Type of variable     | Description                                                                                                                                                                                                                                                                                                                                                                                                                                      | Data source                |
|-----------------------------------------------------------------------------------------------------------------------------------|----------------------|--------------------------------------------------------------------------------------------------------------------------------------------------------------------------------------------------------------------------------------------------------------------------------------------------------------------------------------------------------------------------------------------------------------------------------------------------|----------------------------|
| Demographics (baseline year, FY2012)                                                                                              |                      |                                                                                                                                                                                                                                                                                                                                                                                                                                                  |                            |
| Age                                                                                                                               | Continuous           | Age in years                                                                                                                                                                                                                                                                                                                                                                                                                                     | RPDB                       |
| Sex                                                                                                                               | Categorical (binary) | Sex; female or male                                                                                                                                                                                                                                                                                                                                                                                                                              | RPDB                       |
| Rio2008                                                                                                                           | Continuous           | Rurality Index for Ontario; on a scale of 0 to 100 with 100 being most rural                                                                                                                                                                                                                                                                                                                                                                     | RPDB                       |
| Lowinc                                                                                                                            | Categorical (binary) | Subjects with low income status were identified based upon net household income reported to receive public drug benefit subsidy in FY2012 which relies on actual net income. For a small proportion of HCU (3%) and non-HCU (13%) who did not fill a prescription in FY2012, low-income status was defined as census neighborhood income quintile                                                                                                | ODB                        |
| Recent_immigration                                                                                                                | Categorical (binary) | Whether immigrated in 15 years prior to FY2012 (based on landing records for permanent legal immigrants in Ontario)                                                                                                                                                                                                                                                                                                                              | CIC                        |
| Health status/comorbidity (baseline year, FY2012)                                                                                 |                      |                                                                                                                                                                                                                                                                                                                                                                                                                                                  |                            |
| # of ADGs                                                                                                                         | Continuous           | Aggregated Diagnosis Groups (ADGs) are derived from Johns Hopkins Adjusted Clinical Groups (ACGs, the Johns Hopkins ACG® System Version 10): a person-focused, diagnosis-based way to measure patients' illness                                                                                                                                                                                                                                  | DAD, NACRS, OHIP           |
| Hypertension, Malignancy, Mental health condition                                                                                 | Categorical (binary) | For each condition, whether the patient was diagnosed with the condition in the past 3 years prior to FY2013; computed using John Hopkins Expanded Diagnosis Clusters (EDCs)                                                                                                                                                                                                                                                                     | DAD, NACRS, OHIP           |
| Congestive heart failure, History of myocardial infarction, Chronic Obstructive Pulmonary Disease, Diabetes, Rheumatoid arthritis | Categorical (binary) | Whether the patient is listed in a corresponding ICES-derived cohort for each condition                                                                                                                                                                                                                                                                                                                                                          | CHF, COPD, ODD, OMID, ORAD |
| Healthcare characteristics (baseline year, FY2012)                                                                                |                      |                                                                                                                                                                                                                                                                                                                                                                                                                                                  |                            |
| # of drugnames                                                                                                                    | Continuous           | Number of prescription drugs the patient was dispensed                                                                                                                                                                                                                                                                                                                                                                                           | ODB                        |
| # of physician visits                                                                                                             | Continuous           | Number of physician visits; reported by categories (family practitioner and specialist)                                                                                                                                                                                                                                                                                                                                                          | OHIP                       |
| # of home care visits                                                                                                             | Continuous           | Number of home care visits; reported as total and by categories (nursing, personal support, allied health and other)                                                                                                                                                                                                                                                                                                                             | HCD                        |
| Geriatrician                                                                                                                      | Categorical (binary) | Whether visited a geriatrician                                                                                                                                                                                                                                                                                                                                                                                                                   | OHIP                       |
| Primarycare group                                                                                                                 | Categorical          | Primary care payment models: Fee for Service (FFS), Enhanced FFS, Family Health Team (FHT), Capitation, Other and None. The Enhanced FFS category included patients enrolled with Comprehensive Care Model (CCM) or Family Health Group (FHG), whereas the Other category included those who were enrolled in primary care models other than CCM or FHG or patients not enrolled with any primary care group but who had at least one OHIP claim | CAPE                       |
| Long-term care (LTC)                                                                                                              | Categorical (binary) | Whether was placed in a LTC facility                                                                                                                                                                                                                                                                                                                                                                                                             | ODB                        |
| Features of Index hospitalizations (incident year, FY2013)                                                                        |                      |                                                                                                                                                                                                                                                                                                                                                                                                                                                  |                            |

Appendix to: Muratov S, Lee J, Holbrook A, et al. Unplanned index hospital admissions among new older high-cost health care users in Ontario: a population-based matched cohort study. *CMAJ Open* 2019. DOI:10.9778/cmajo.20180185. Copyright © 2019 Joule Inc. or its licensors

|                  |             |                                          |     |
|------------------|-------------|------------------------------------------|-----|
| LOS              | Continuous  | Length of stay, days                     | DAD |
| instftyp_        | Categorical | Institution from where admitted          | DAD |
| instlhin_        | Categorical | LHIN where admitted                      | DAD |
| dx10code1-25     | Character   | Diagnosis ICD10 codes for each admission | DAD |
| dischdisp        | Categorical | Institution where discharged to          | DAD |
| inpatient_costs_ | Continuous  | Inpatient hospitalization Costs          | DAD |

CAPE - Client Agency Program Enrolment, ICES-derived (Congestive Heart Failure (CHF) database; Chronic Obstructive Pulmonary Disease (COPD) database; Ontario Diabetes Database (ODD); Ontario Myocardial Infarction Database (OMID); and the Ontario Rheumatoid Arthritis Database (ORAD)); CIC - Citizenship and Immigration Canada; DAD – Discharge Abstract Database; NACRS - National Ambulatory Care Reporting System; HCD - Ontario Home Care Database; ODB – Ontario Drug Benefit; OHIP - Ontario Health Insurance Plan; RPDB - Ontario Registered Persons Database
